# Supplementary material for: YTHDF2 promotes mitotic entry and is regulated by cell cycle mediators
Source: PubMed Central journal article supplement (PMC7170294; doi:10.1371/journal.pbio.3000664), 2020-04-08

# Raw images of western blotting

## Related to Fig 2A

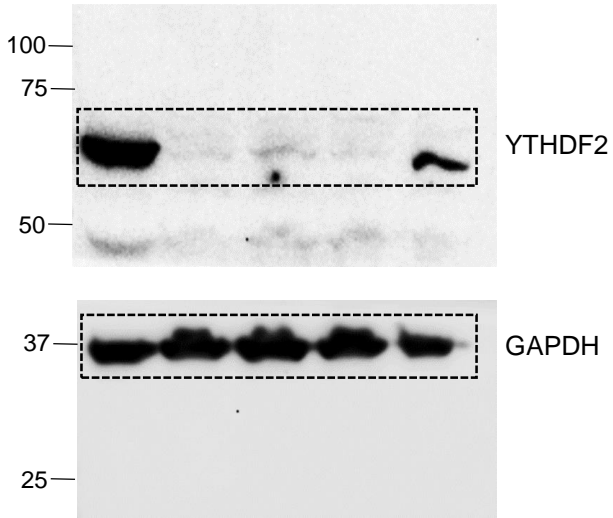

## Related to Fig 3B

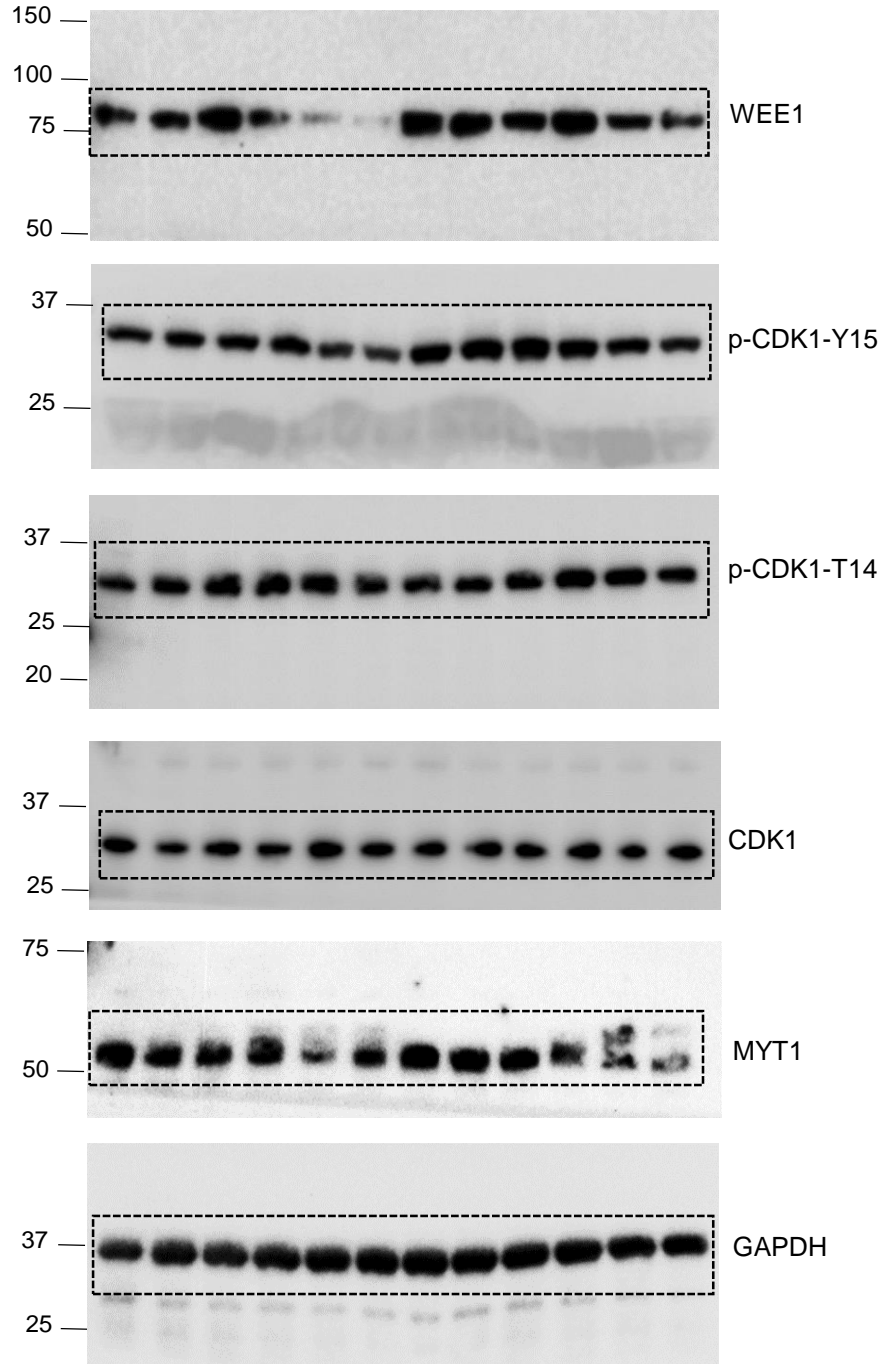

**Related to Fig 4A**

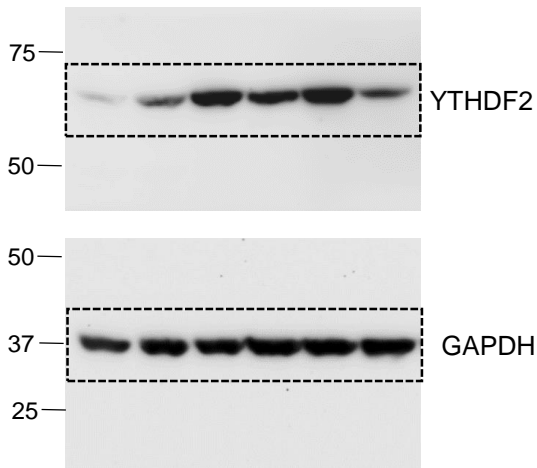

**Related to Fig 4B**

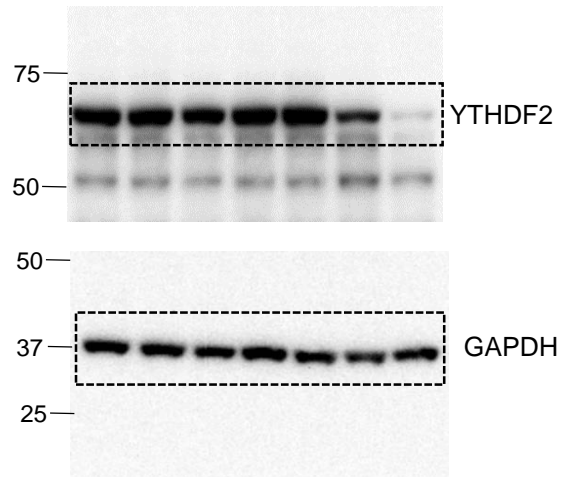

**Related to Fig 4C**

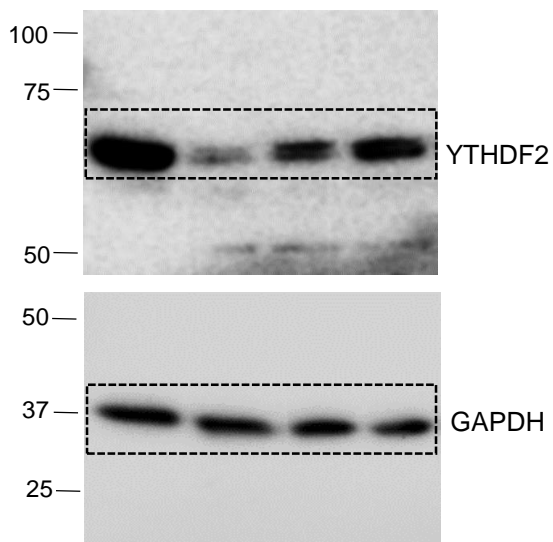

**Related to Fig 4D**

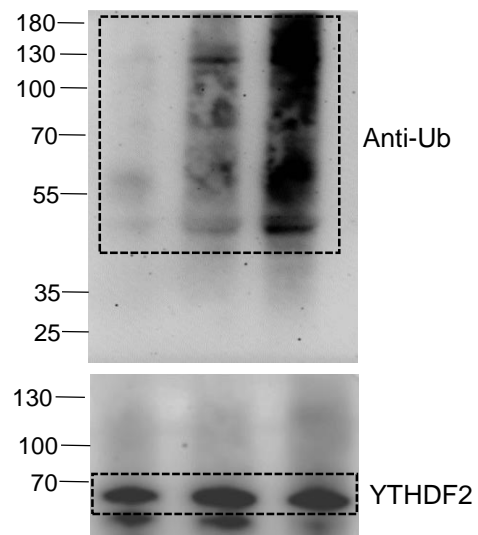

**Related to Fig 4E**

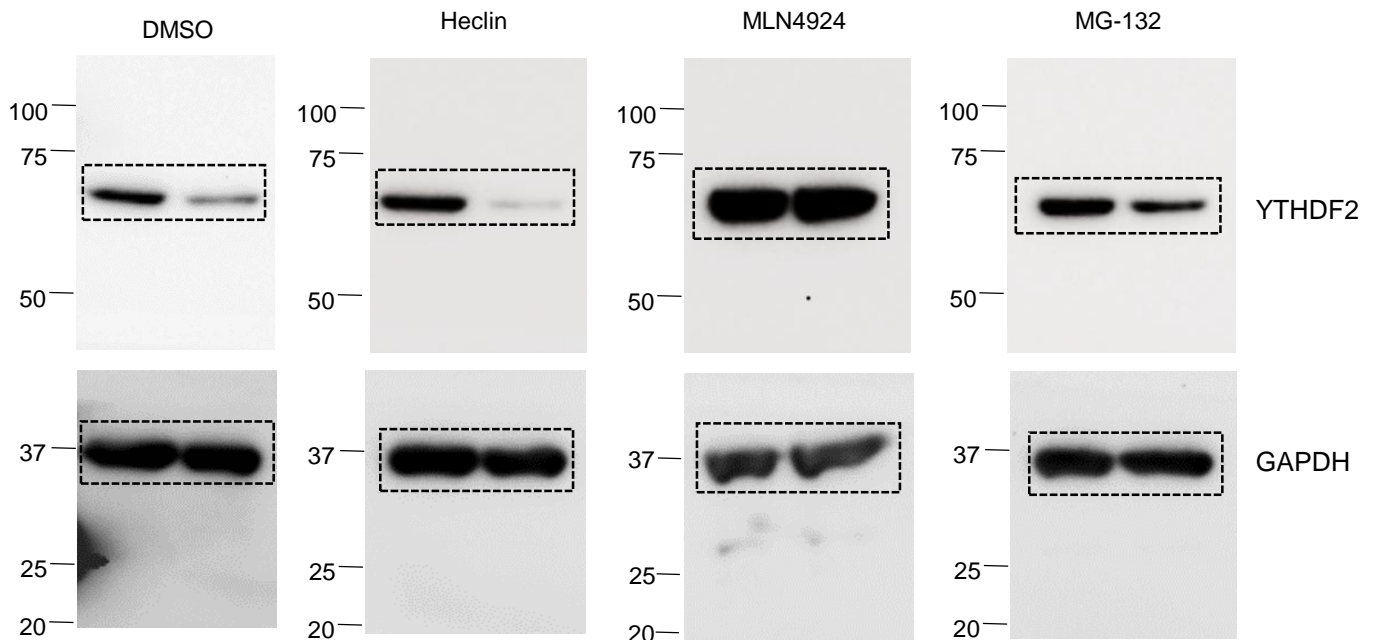

### Related to Fig 4F

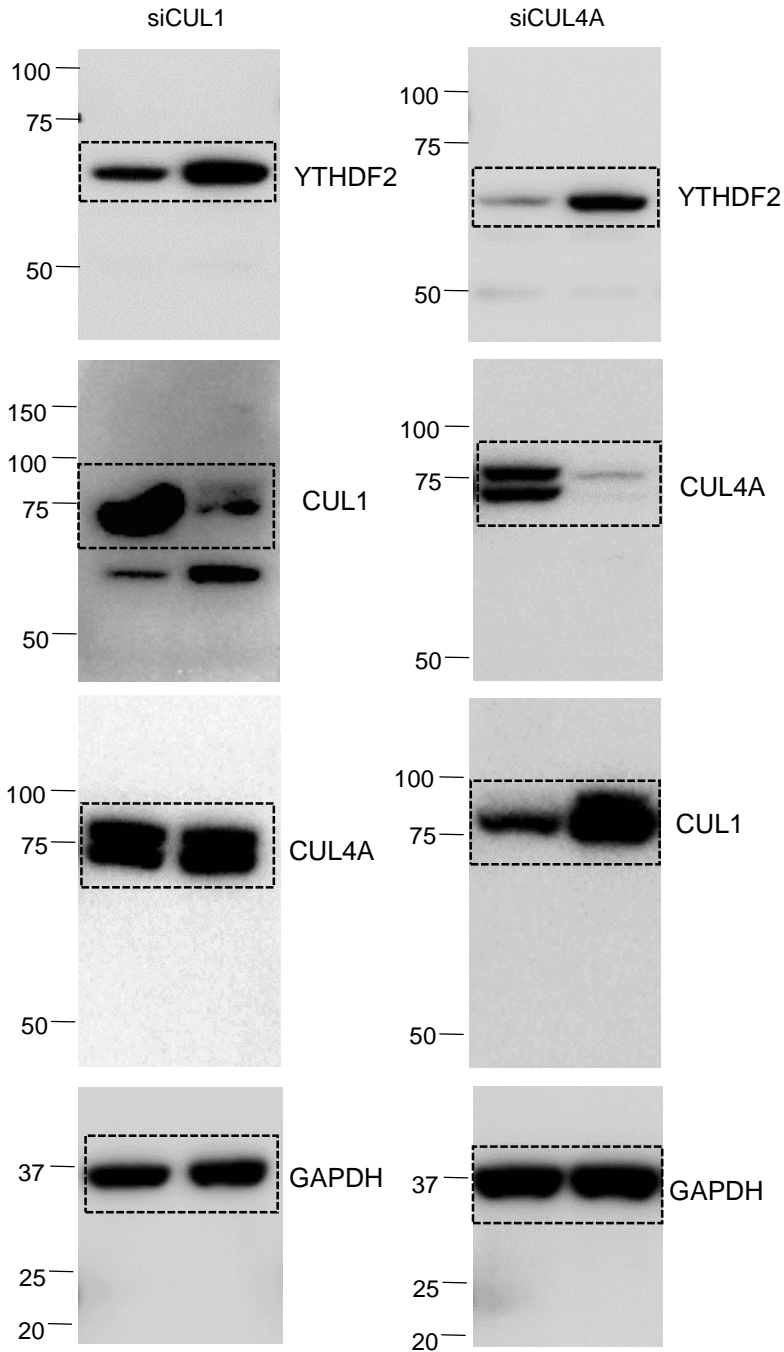

### Related to Fig 4G

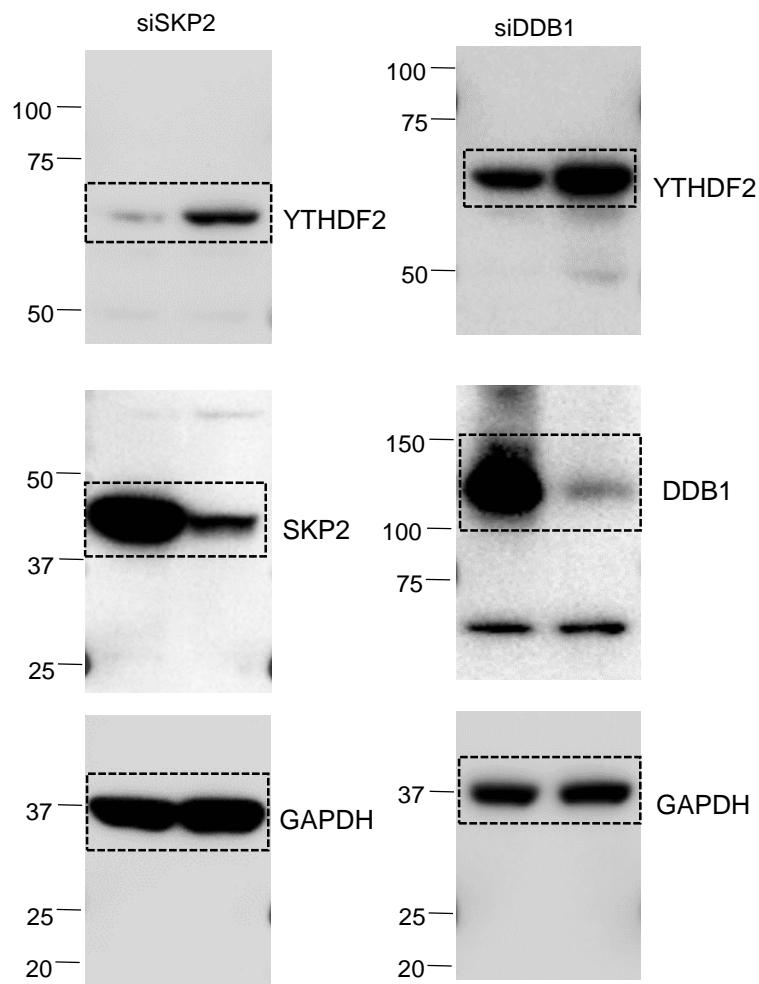

### Related to Fig 4H

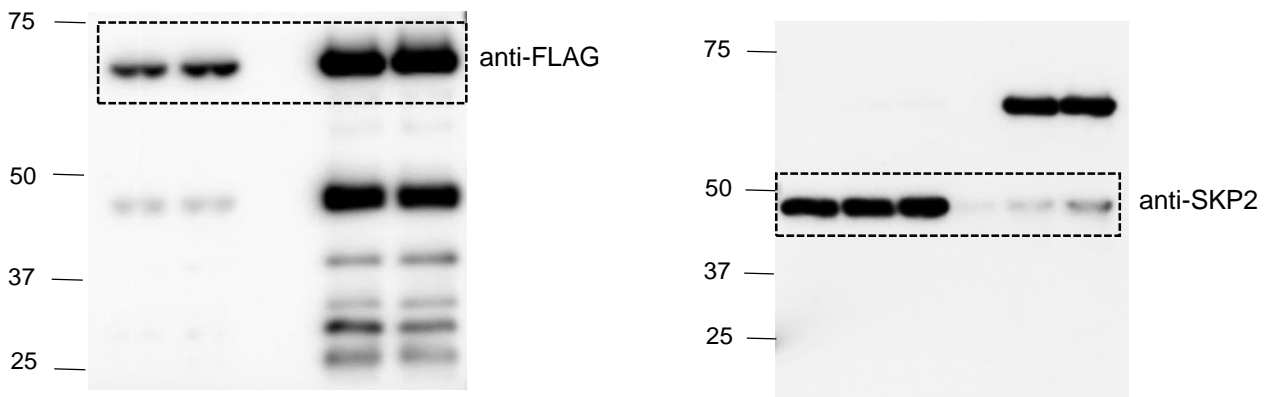

**Related to Fig S4E**

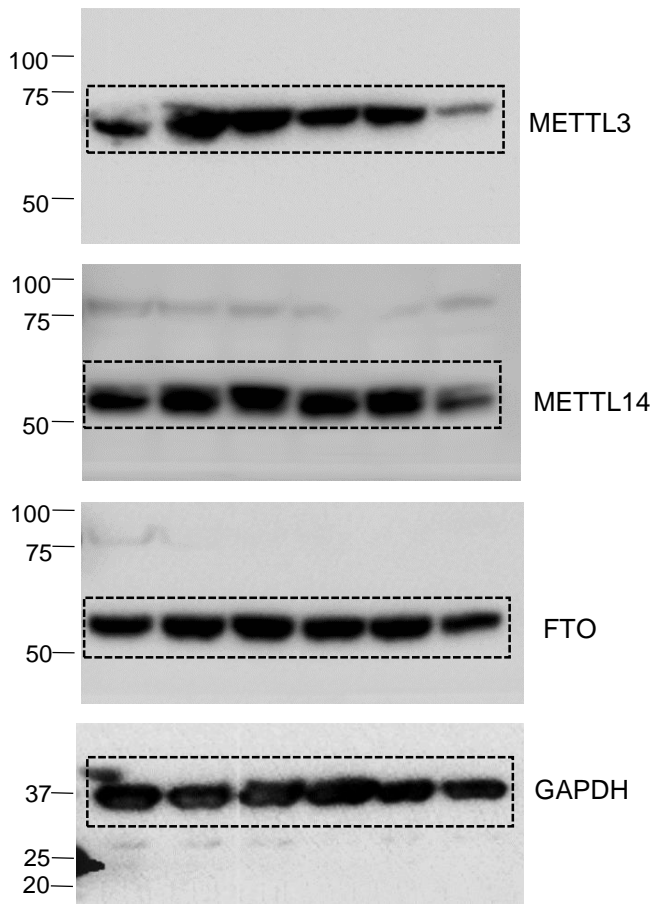

**Related to Fig S5C**

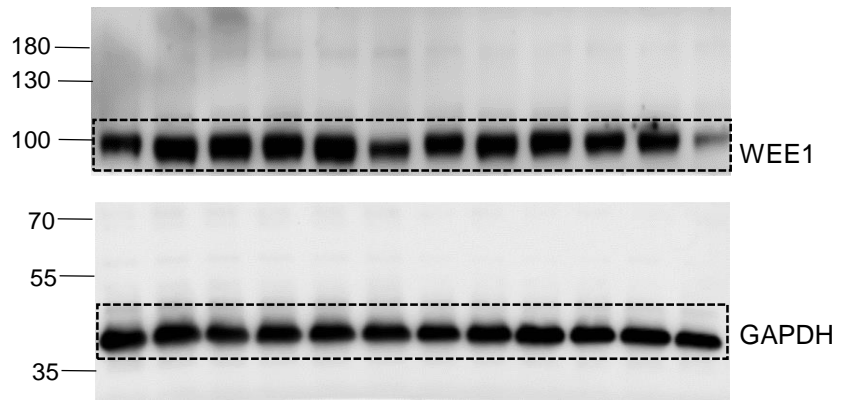

**Related to Fig S5E**

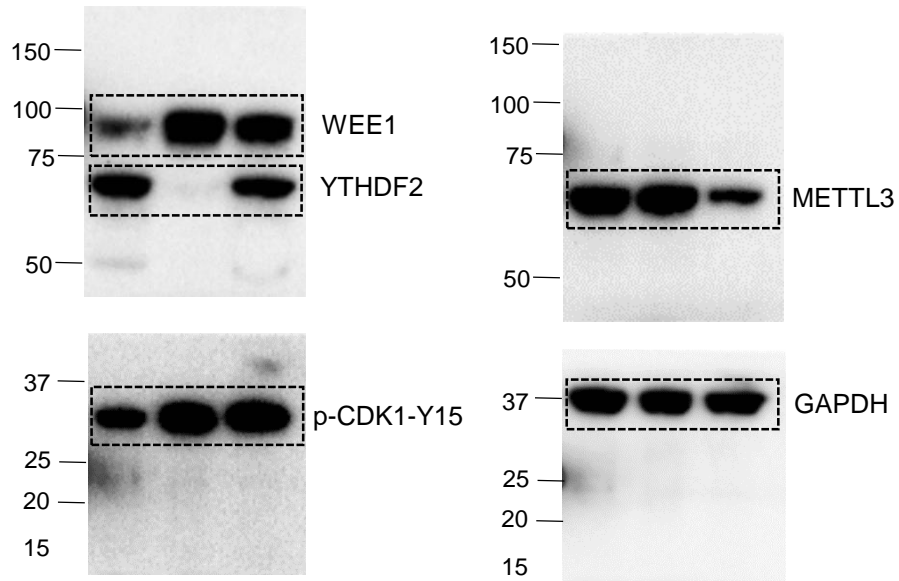

**Related to Fig S6B**

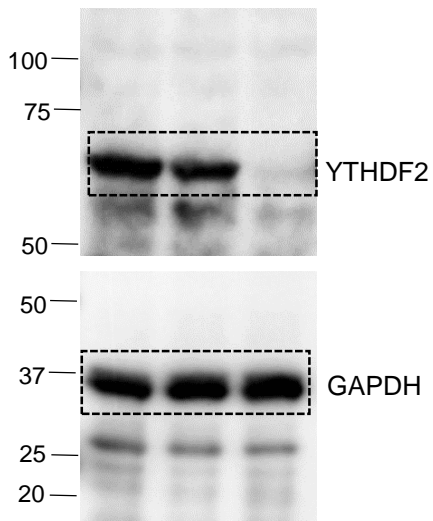

**Related to Fig S6C**

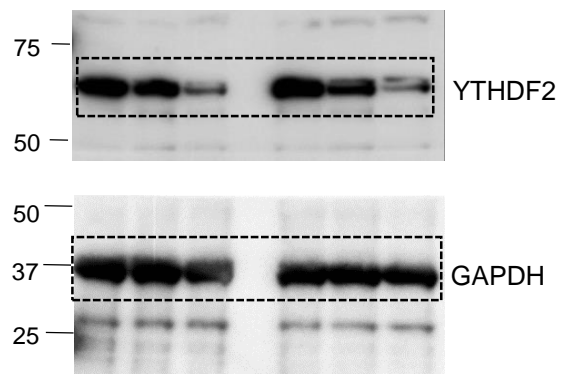

## Related to Fig S6D

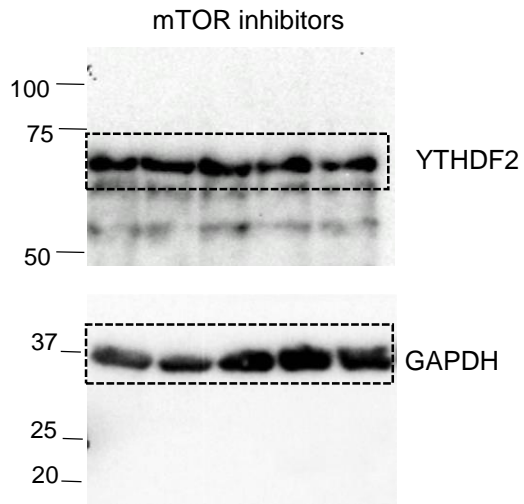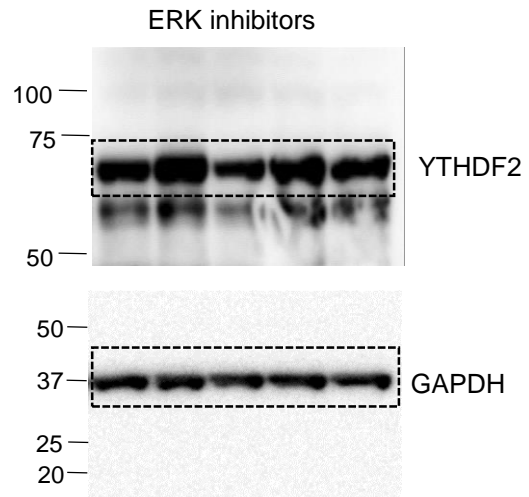

## Related to Fig S6E

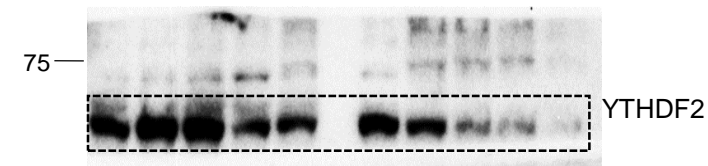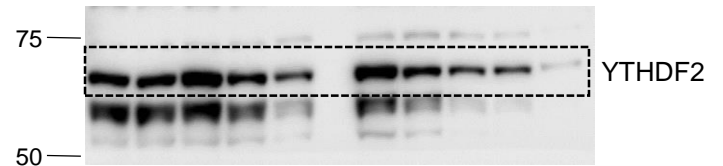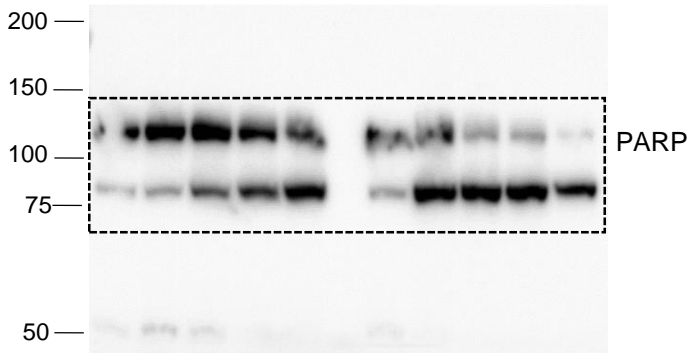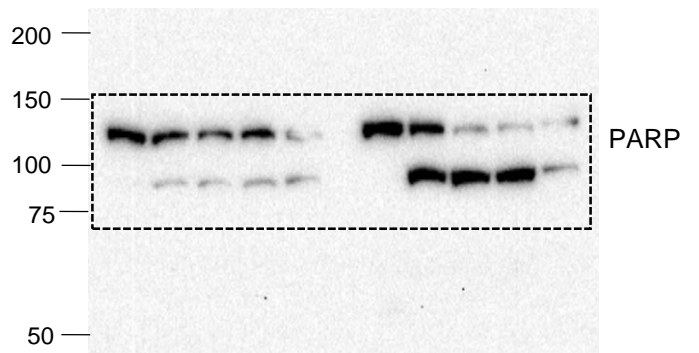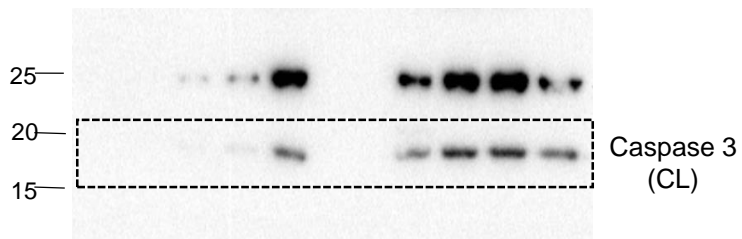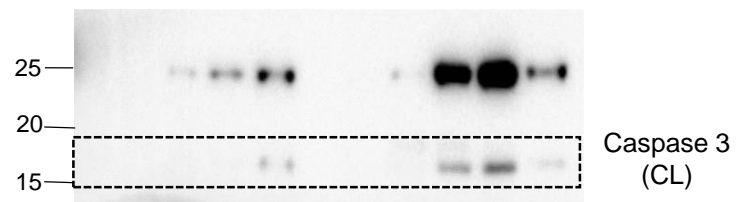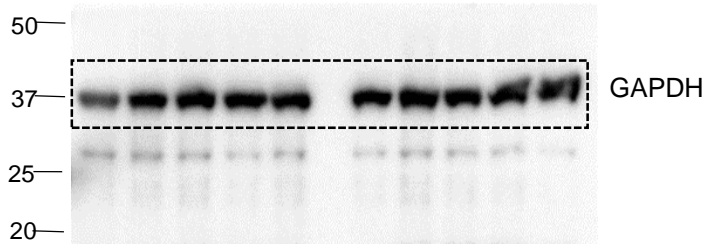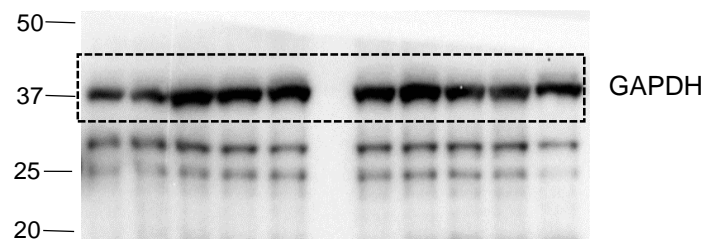

### Related to Fig S7A

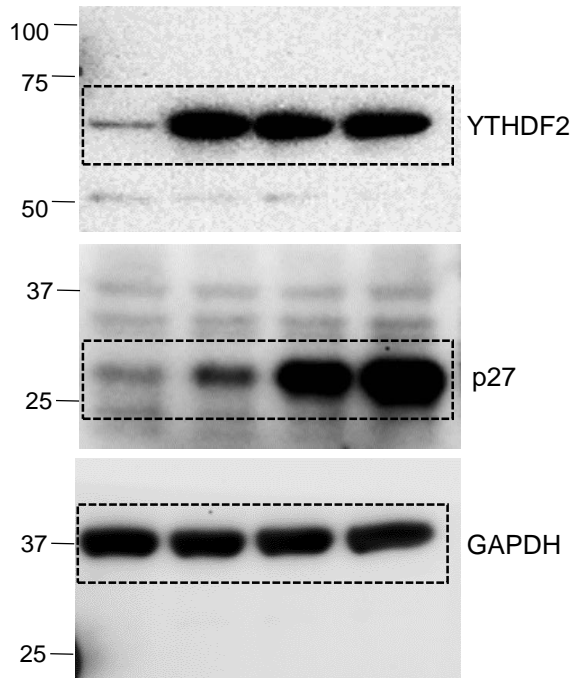

### Related to Fig S7B

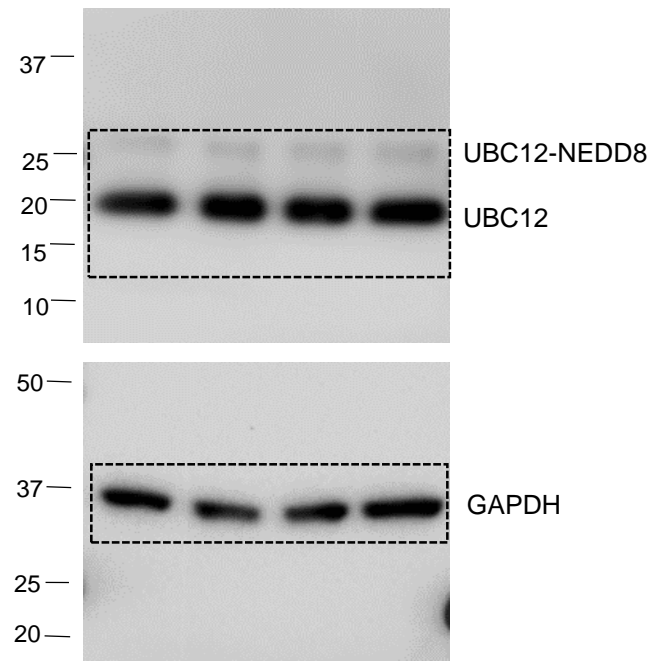

### Related to Fig S7C

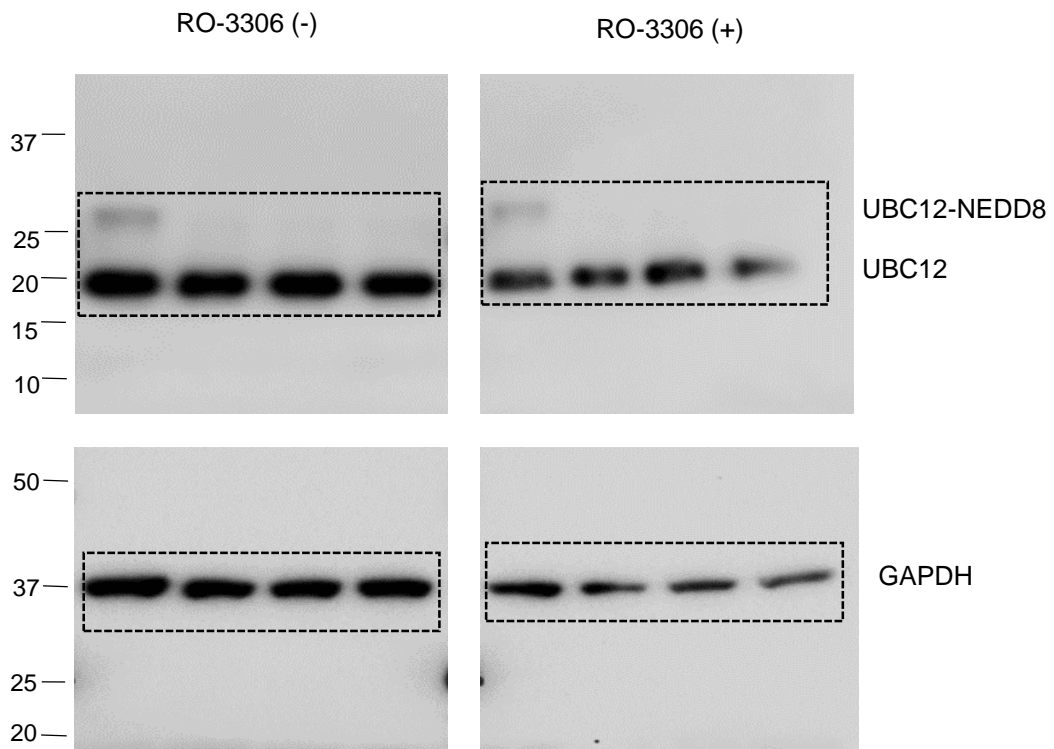

## Related to Fig S7D

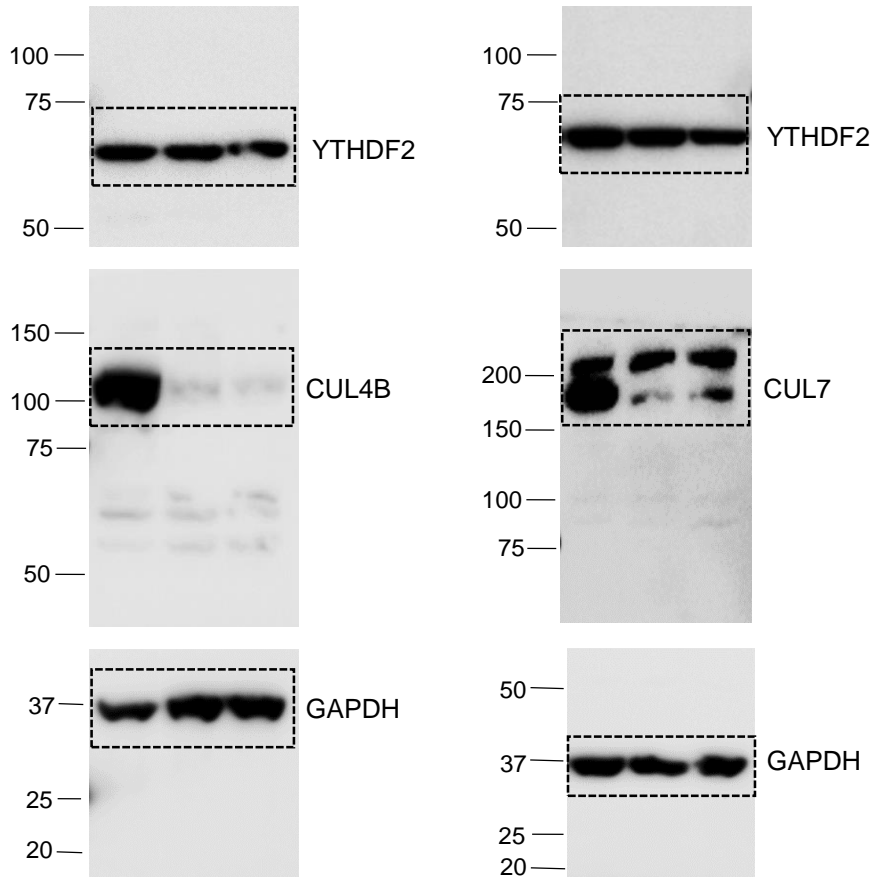

## Related to Fig S7E

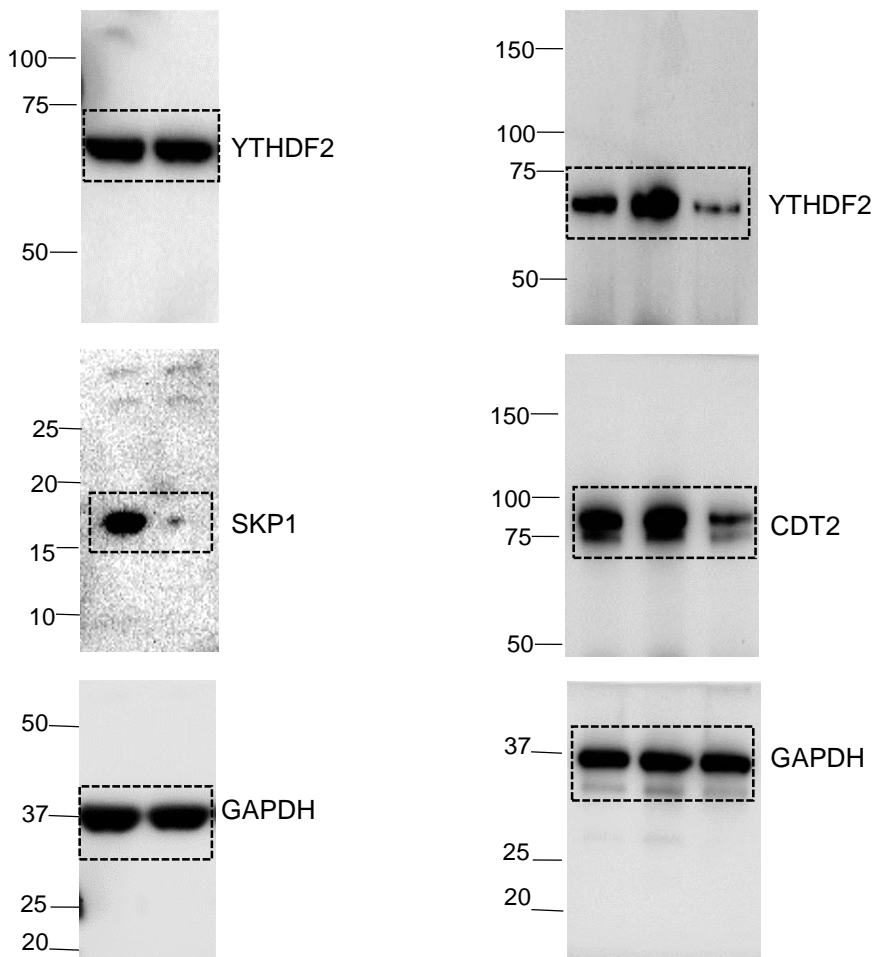

Supplement: pbio.3000664.s014.pdf [file pbio.3000664.s014.pdf]
